1 Running Head: Phylogeography of hybridizing beardtongues

2

3 Title: Phylogeographic analysis of shrubby beardtongues reveals range expansions during the

4 Last Glacial Maximum and implicates the Klamath Mountains as a hotspot for hybridization

5

6 Authors:

7 Benjamin W. Stone<sup>1\*</sup>

8 Andrea D. Wolfe<sup>1</sup>

9

10 <sup>1</sup>Department of Evolution, Ecology, and Organismal Biology

11 The Ohio State University

12 Columbus, OH 43210

13

14 \*Corresponding author:

15 Email: stone.494@osu.edu

16

17 **Keywords:**

18 hybridization, introgression, Pacific Northwest, phylogeography, RADseq

19

20 ORCID ID:

21 Benjamin Stone: 0000-0002-7955-1264

22

23

24 **Abstract:**

25           Quaternary glacial cycles often altered species' geographic distributions, which in turn  
26 altered the geographic structure of a species' genetic diversity. In many cases, glacial expansion  
27 forced species in temperate climates to contract their ranges and reside in small pockets of  
28 suitable habitat (refugia), where they were likely to interact closely with other species, setting the  
29 stage for potential gene exchange. These introgression events, in turn, would have degraded  
30 species boundaries, making the inference of phylogenetic relationships challenging. Using high-  
31 throughput sequence data, we employ a combination of species distribution models, models of  
32 demographic history, and hybridization tests to assess the effect of glaciation on the geographic  
33 distributions, phylogenetic relationships, and patterns of gene flow of five species of *Penstemon*  
34 subgenus *Dasanthera*, long-lived shrubby angiosperms distributed throughout the Pacific  
35 Northwest of North America. Surprisingly, we find that rather than reducing their ranges to small  
36 refugia, most *Penstemon* subgenus *Dasanthera* species experienced increases in suitable habitat  
37 during the Last Glacial Maximum. We also find substantial evidence for gene exchange between  
38 species, with the bulk of introgression events occurring in or near the Klamath Mountains of  
39 southwestern Oregon and northwestern California. Subsequently, our phylogenetic inference  
40 reveals blurred taxonomic boundaries in the Klamath Mountains, where introgression is most  
41 prevalent. Our results question the classical paradigm of temperate species' responses to  
42 glaciation, and highlight the importance of contextualizing phylogenetic inference with the  
43 demographic histories of the species of interest.

44

45

46

47 **Introduction:**

48           Throughout the Quaternary Period, the Pacific Northwest of North America (PNW)  
49 experienced dramatic shifts in climate due to the repeated expansion and retreat of glaciers  
50 (Shafer, Cullingham, Côte, & Coltman, 2010). At the peak of the most recent glacial expanse,  
51 known as the last glacial maximum (LGM), global temperatures in the PNW were substantially  
52 colder than present-day (Otto-Bliesner & Brady, 2006), and massive ice sheets rendered large  
53 regions of land inhospitable for many species (Pielou, 2008). After the LGM, conditions in the  
54 PNW became increasingly hot, reaching a temperature maximum near the mid-Holocene period,  
55 about 6,000 years BP (Renssen *et al.*, 2009; Wanner *et al.*, 2008).

56           Such dramatic fluctuations in climate undoubtedly altered species' distributions through  
57 time. Many species may have survived in one or more pockets of suitable habitat (i.e. refugia)  
58 during these glacial cycles. Given the myriad effects that such processes could have on the  
59 spatial distribution of contemporary genetic diversity, many studies have focused on identifying  
60 such refugia and better understanding patterns of contraction and expansion in response to  
61 glacial cycles (Avice, 2000; Hewitt, 2000). As a result, there is a rich history of phylogeographic  
62 research in the PNW (Shafer *et al.*, 2010). Although the response of species to glacial cycles  
63 depends on their ecological and climatic tolerances (Hewitt, 2004; Stewart, Lister, Barnes, &  
64 Dalén, 2010), phylogeographic studies have identified several recurrent patterns of genetic  
65 differentiation across a broad range of taxa. For example, Soltis, Gitzendanner, Streng, and  
66 Soltis (1997) described a north-south pattern of genetic differentiation in several species of  
67 plants distributed along the Cascades and Coastal Mountain ranges. In addition to this, Soltis *et*  
68 *al.* (1997) identified reduced genetic diversity in the northern portion of some species' ranges  
69 compared to the south, suggesting the presence of southern refugia for many species during the

70 LGM, and the potential for multiple refugia in the coastal range and Klamath Mountains of  
71 southwestern Oregon and northwestern California. Brunsfeld, Sullivan, Soltis, and Soltis (2001)  
72 elaborated on these findings, outlining expectations for the hypotheses outlined in Soltis *et al.*  
73 (1997), and formulating new phylogeographic hypotheses for species with Cascade/Sierran  
74 distributions (*e.g.*, the clinal environment hypothesis).

75         The Klamath Mountains, one of the potential refugial locations highlighted by Soltis *et*  
76 *al.* (1997), host a complex vegetative history owing to their old geologic age, edaphic diversity,  
77 and their ability to support mesophytic and xerophytic plant communities (Whittaker, 1961). The  
78 Klamath region has long been considered a potential refugium for plant species, as species with  
79 more northerly distributions likely invaded the Klamath Mountains during the cooler conditions  
80 of the Pleistocene, then remained there once the climate warmed again by moving to higher  
81 elevations (Smith & Sawyer, 1988; Whittaker, 1961). Indeed, the Klamath Mountains have been  
82 identified as an important geographic feature for many plant taxa, including as an area with  
83 genetic substructure or divergence (Furnier & Adams, 1986; Soltis *et al.*, 1997), as a major  
84 phylogeographic break point or area where sister species' ranges abut (Gugger, Sugita, &  
85 Cavender-Bares, 2010; Patterson & Givnish, 2003), and as a glacial refugium (Eckert, Tearse, &  
86 Hall, 2008; Kiefer, Dobeš, Sharbel, & Koch, 2009). The biogeographic importance of this region  
87 is not just limited to plants, however, as it is also a potential refugium for *Plethodon* salamanders  
88 (Pelletier, Duffield, & DeGrauw, 2011), *Anaxyrus* toads (Goebel, Ranker, Corn, & Olmstead,  
89 2009), and *Taricha* newts (Kuchta & Tan, 2005).

90         Advancements in sequencing technology have given rise to an increased availability of  
91 high-throughput sequence data for use in phylogeographic studies (Garrick *et al.*, 2015), which  
92 has in turn allowed researchers to compare more complex models of demographic history (*e.g.*,

93 Smith *et al.*, 2017). Although it has long been suggested that the expansion and contraction of  
94 species ranges in response to glacial cycles led to the formation of many hybrid zones (Hewitt,  
95 2011; Stebbins, 1985), the use of high-throughput sequence data in phylogeographic studies has  
96 increased awareness of the prevalence and complexity of gene flow and hybridization in species'  
97 responses to climatic change (Maier, Vandergast, Ostoja, Aguilar, & Bohonak, 2019; Ruffley *et*  
98 *al.*, 2018; Smith & Carstens, 2020). There are numerous potential outcomes of secondary  
99 contact, but some well-known examples include lineage fusion, (Petit *et al.*, 2003), adaptive  
100 introgression (Anderson & Stebbins, 1954), and speciation via reinforcement (Butlin, 1987). In  
101 cases where lineages from separate refugia hybridize upon secondary contact, genetic diversity  
102 may increase as the result of lineage fusion (Maier *et al.*, 2019; Petit *et al.*, 2003), although in  
103 some cases there may be a loss of genetic diversity, instead (Colella *et al.*, 2018). Hybridization  
104 after substantial climatic changes could have adaptive benefits, as novel gene combinations  
105 produced upon secondary contact could be beneficial in new, open environments (Stebbins,  
106 1985). The onset of hybridization often does not have adaptive advantages, however. In cases  
107 where hybrids are less fit in their environment than either parent, hybridization may facilitate  
108 speciation via reinforcement (Butlin, 1987; Dufresnes *et al.* 2020). Hybridization could also be  
109 due to the unusual circumstances surrounding the colonization of new habitats. For example,  
110 colonizers at the front-end of expansion are more likely to hybridize due to limited mate choice  
111 and a multitude of new contact points with closely related species (Currat, Ruedi, Petit, &  
112 Excoffier, 2008).

113 In this study, we aim to understand the response of five species of the genus *Penstemon*  
114 Schmidel (Plantaginaceae) to climatic fluctuations during the late Quaternary period, in order to  
115 better appreciate how geographic distributions and demographic histories may align to promote

116 gene flow between species. The genus *Penstemon*, commonly known as the beardtongues, is the  
117 largest genus of angiosperms endemic to North America, with nearly 300 described species  
118 (Freeman, 2019; Wolfe *et al.*, 2006). Owing its species richness to a putative adaptive radiation,  
119 *Penstemon* exhibits exceptional floral diversity, and its species occupy a wide variety of  
120 ecological niches, although in general, they prefer semi-disturbed, arid habitats (Wolfe *et al.*,  
121 2006). Although some phylogenetic relationships between *Penstemon* species are obscured,  
122 likely due to incomplete lineage sorting (Wessinger, Freeman, Mort, Rausher, & Hileman, 2016;  
123 Wessinger, Rausher, & Hileman, 2019), one consistent taxonomic group has been the subgenus  
124 *Dasanthera*, which contains nine species total, and is sister to the rest of the genus. Known  
125 colloquially as shrubby beardtongues, members of *Penstemon* subg. *Dasanthera* are primarily  
126 outcrossing, long-lived plants, typically persisting as low-lying subshrubs in semi-disturbed,  
127 rocky habitats. Dispersal is apparently limited – seeds have no obvious mechanisms to facilitate  
128 wind-, water-, or animal-mediated dispersal – and this is thought to contribute to their propensity  
129 to form scattered, isolated populations (Every, 1977). Species in *Penstemon* subg. *Dasanthera*  
130 are found mainly in mountainous areas of the PNW, but extend into surrounding regions,  
131 including California, western Montana, northwestern Wyoming, northern Utah, and western  
132 Nevada. Four species (*P. rupicola*, *P. cardwellii*, *P. newberryi*, and *P. davidsonii*) have a  
133 primarily Cascades/Sierra Nevada distribution, three species (*P. lyallii*, *P. ellipticus*, and *P.*  
134 *montanus*) have a northern Rocky Mountains distribution, and one species (*P. fruticosus*) is  
135 distributed in both the Cascades and northern Rocky Mountains, and in scattered mountains  
136 surrounding the Columbia Basin. Hybridization is common in *Penstemon* subg. *Dasanthera*, and  
137 there are many well-documented localities at which natural hybrids form, both at local scales,  
138 where persistent backcrossing into parental species is unlikely, and at wider scales, wherever

139 species distributions overlap (Clausen, Keck, & Hiesey, 1940; Datwyler & Wolfe, 2004; Every,  
140 1977). Of particular interest in this context are the Klamath Mountains. Every (1977) identified  
141 this area as a hotspot for *Penstemon* subg. *Dasanthera* hybridization, noting the overlap of  
142 several species' distributions, and suggesting that hybridization was likely ancient rather than the  
143 result of recent and localized introgression. The goals of the present study are to (1) estimate  
144 relationships among species of *Penstemon* subg. *Dasanthera* (hereafter referred to as  
145 *Dasanthera*) found in the Cascades and Sierra Nevada mountains, (2) identify the location and  
146 timing of refugia for these species, and (3) identify introgressed *Dasanthera* lineages at a broad  
147 geographic scale, focusing on the Klamath Mountains.

148

## 149 **Materials and Methods:**

### 150 *Data generation*

151 We collected a total of 141 samples representing *Dasanthera* species found in the  
152 Cascade and Sierra Nevada Mountains (*P. rupicola*, *P. cardwellii*, *P. newberryi*, *P. davidsonii*,  
153 and *P. fruticosus*), and 3 samples of *Penstemon montanus* var. *montanus* from Idaho for use as  
154 an outgroup. Because our goals for this study were to better understand the demographic  
155 histories of species found on the western side of the Columbia Basin, we did not include samples  
156 of *P. lyallii* and *P. ellipticus*, as these species are distributed only in the northern Rocky  
157 Mountains, east of the Columbia Basin, and are thus outside the immediate scope of this study.  
158 For this reason, we only included samples of the widespread and variable *P. fruticosus* from the  
159 Cascades Mountains, rather than including samples from the Rocky Mountains. In addition, we  
160 did not include samples of the rare and narrowly endemic *P. barrettiae*, which is a species of  
161 conservation concern in the states of Washington and Oregon, and is found only along a roughly

162 fifty mile stretch of the Columbia River east of Portland, OR. The majority of samples (97) were  
163 collected during the summers of 2016, 2017, and 2018. The 27 remaining samples collected by  
164 the authors were collected either in 1996 or 1999. We also included samples from 20 herbarium  
165 tissue loans from herbaria at the University of Washington and Oregon State University. These  
166 samples ranged in collection date from 1993 to 2017. In total, our sampling represents 86 unique  
167 localities for five of the six *Dasanthera* species and four of the five varieties present in the  
168 Cascade and Sierra Nevada Mountains, across the bulk of the range of most of these species  
169 (Supplemental Table 1).

170 All samples collected by the authors were dried with silica gel immediately upon  
171 collection. Leaf tissues from herbarium samples were procured directly from herbarium sheets,  
172 or from additional pouches of dried material accompanying the collections when available. DNA  
173 was extracted using a modified CTAB protocol (Wolfe, 2005) and quantified using a Qubit  
174 fluorometer. We prepared Genotyping by Sequencing (GBS) libraries using 100 nanograms of  
175 DNA from each sample and a modified version of the Elshire *et al.* (2011) protocol. We  
176 sequenced DNA libraries on an Illumina Hi-Seq 2500 using paired-end 150 bp sequencing at  
177 Novogene Corporation Inc. (Sacramento, CA).

178 We used *ipyrad* v0.9.20 (Eaton & Overcast, 2020) for GBS data processing. We trimmed  
179 all reads to 50 bp prior to analysis and discarded reverse reads from the paired-end sequencing,  
180 because preliminary analysis indicated that doing so produced higher-quality loci with more  
181 overlap across species. We produced six different types of data sets with *ipyrad*. The first data  
182 set includes every sample in the analysis, including the outgroup. The remaining five data sets  
183 are species-specific, *i.e.*, each data set only includes samples from a single species. All data sets  
184 only include loci that are present in at least 50% of the samples in that data set, and are limited to



185 a maximum depth of 100,000 reads. The remainder of the parameters for data processing are the  
186 default parameters for *ipyrad*.

187

### 188 *Identification of populations*

189 We used STRUCTURE (Pritchard, Stephens, & Donnelly, 2000) on the species-specific  
190 data sets to estimate the number of populations in each species, and to assign individuals to  
191 putative populations. We implemented STRUCTURE with an iterative approach using the  
192 *analysis.structure* command in *ipyrad*. For each data set we discarded the first 250,000  
193 generations as burn-in, and ran STRUCTURE for 1,000,000 steps thereafter, performing ten  
194 replicates for each value of K tested. All other parameters were left on the default values set by  
195 the *ipyrad.analysis* toolkit. We considered values of K=1 to K=10 for each species, except for *P.*  
196 *fruticosus*, for which we considered values of K=1 to K=6 due to its smaller sample size (n =  
197 10). We then used visualizations of log-likelihood scores and the  $\Delta K$  method (Evanno, Regnaue,  
198 & Goudet, 2005) to determine the optimal value of K, and visualized results using the *ipyrad-*  
199 *analysis* toolkit. All downstream analyses that implement the results of STRUCTURE do so by  
200 assigning individuals to the highest percentage genetic cluster in the most likely value of K for  
201 that species (except for *P. newberryi*: see Results section).

202

### 203 *Species distribution models*

204 To better understand how species' distributions have changed through time, we built  
205 species distribution models (SDMs) for the present-day, the mid-Holocene warm period, and the  
206 LGM. To obtain localities to build SDMs, we searched the Global Biodiversity Information  
207 Facility (gbif.org) for occurrence points for all of the species in our study. We curated these

208 results by removing duplicates, manually removing obvious outliers, and filtering out latitude  
209 and longitude coordinates that were precise to at least the third decimal place. This resulted in  
210 657 occurrence points for *P. davidsonii*, 135 occurrence points for *P. rupicola*, 182 occurrence  
211 points for *P. fruticosus*, 115 occurrence points for *P. cardwellii*, and 1402 occurrence points for  
212 *P. newberryi*. We downloaded climate data from the WorldClim database (Hijmans, Cameron,  
213 Parra, Jones, & Jarvis, 2005) for the present-day, the mid-Holocene, and the LGM. Data for the  
214 current and mid-Holocene climates were at a resolution of 30 arc seconds, and LGM data were at  
215 a resolution of 2.5 minutes. Both the LGM and mid-Holocene data sets were generated by the  
216 CCSM4 model. We used only uncorrelated bioclimatic variables (Pearson's  $r < 0.7$ ), and used  
217 the same variables for each species. When given a decision about which correlated variable to  
218 remove, we retained variables that we suspected would be more important for explaining  
219 species' distributions. The final variables used for SDM construction can be found in the  
220 Supplemental Table 2. After locality and climate data were curated, we built SDMs with the  
221 ensemble method implemented in the R package *biomod2* (Thuiller, Georges, Engler, Breiner, &  
222 Georges, 2016). We used four modeling approaches in *biomod2*: Random Forests, General  
223 Linear Models, Generalized Boosting Models, and Maximum Entropy as implemented in *Maxent*  
224 (Phillips, Anderson, & Schapire, 2006). We first cropped our raster files to  $-150^{\circ}$  to  $-100^{\circ}$   
225 longitude and  $35^{\circ}$  to  $65^{\circ}$  latitude. We decided to use an extent that was larger than the range of  
226 our species of interest because it is plausible that species had distributions during the mid-  
227 Holocene and the LGM that are not confined within their current ranges. This extent also  
228 captures the distribution of the subgenus as a whole, including species that are not examined in  
229 this study. We ran five replicates per model, and randomly sampled 10,000 background  
230 pseudoabsences with the 'random' strategy in *biomod2*. We used 80% of our occurrence points

231 for training models, 20% for testing models, and evaluated modules using the receiver operating  
232 characteristic (ROC) curve. For ensemble modeling, we only included models with an ROC  
233 score  $> 0.85$ , and weighted models based on their ROC score. Ensemble models were then  
234 forecast onto current, mid-Holocene, and LGM climate conditions.

235

### 236 *Models of demographic history and relationships between taxa*

237 We used the R package *delimitR* (Smith & Carstens, 2020) to test models of demographic  
238 history within species. *delimitR* uses a machine learning algorithm to compare data simulated  
239 under demographic models of interest to a folded multi-dimensional site frequency spectrum  
240 (mSFS) constructed from high-throughput sequence data. Although *delimitR* was designed as  
241 software for species delimitation, it is able to compare models that differ with respect to the  
242 inclusion or absence of gene flow, divergence times, and relationships between lineages, making  
243 it a flexible and useful method to test models of demographic history more generally. Our main  
244 goal with *delimitR* was to determine whether intra-specific divergence occurred before or after  
245 the LGM. Specifically, our models focus on divergence times between lineages; did lineages  
246 diverge prior to the LGM, or did they diverge after the LGM? Model sets for both two-lineage  
247 and three-lineage species, as determined by STRUCTURE, can be seen in Figure 1. Our model  
248 set for species with two identified lineages includes the following scenarios: (1) post-LGM  
249 divergence (100 to 21,000 generations), (2) pre-LGM divergence (130,000 to 2,400,000  
250 generations), and (3) pre-LGM divergence with secondary contact (migration). We defined pre-  
251 LGM divergence times to be between the start of the Pleistocene and the end of the interglacial  
252 cycle immediately preceding the LGM. Our reasoning for this is twofold. First, preliminary tests  
253 revealed that models were difficult to differentiate if priors on divergence times were too close to

254 one another. Second, we suspect that the interglacial period immediately preceding the LGM  
255 would have had less suitable habitat (and thus species would have been the most isolated) than at  
256 any other point during the last glacial cycle (see Results). Any signal of divergence prior to the  
257 LGM should be captured with this broad prior space.

258 Our model set for species with three lineages is an extension of the model set for two  
259 lineages. For post-LGM divergence, priors on divergence times correspond to the beginning of  
260 the Holocene to present day for the most recent divergence (100 to 12,000 generations ago), and  
261 to the estimated timing of the LGM  $\pm$  1,000 generations for the oldest divergence (19,000 to  
262 21,000 generations ago). For pre-LGM divergences, priors on divergence times correspond to the  
263 LGM to the present day for the most recent divergence (100 to 21,000 generations ago), and to  
264 the beginning of the Pleistocene to the end of the last interglacial period for the oldest divergence  
265 (130,000 to 2,400,000 generations ago). We also included two pre-LGM divergence models with  
266 gene flow, allowing gene flow between each one of the sister lineages and the nonsister lineage  
267 (no gene flow between sister lineages). We tested this set of four models for all three possible  
268 topologies, for a combined total of twelve models. To conduct simulations in *delimitR*, we  
269 constructed five replicates of the mSFS with unlinked SNPs by randomly down-sampling 50% of  
270 the haplotypes assigned to each identified lineage with custom scripts available on the  
271 developer's github (<https://github.com/meganlsmith>). We performed 20,000 simulations under  
272 each model in *fastsimcoal2* (Excoffier, Dupanloup, Huerta-Sánchez, Sousa, & Foll, 2013), and  
273 binned the mSFS for each species according to the  $2N$  sample size of the population with the  
274 fewest samples, with a maximum of six bins. We used 500 decision trees to build the random  
275 forest classifier.

276 We used *SVDQuartets* (Chifman & Kubatko, 2014) to infer relationships between  
277 populations identified via STRUCTURE in a multispecies coalescent framework. For this  
278 analysis we used the data set which included all individuals across species boundaries,  
279 partitioned taxa by their identified genetic lineage, and set *Penstemon montanus* as the outgroup  
280 taxon. We evaluated all possible quartets and performed 100 bootstrap replicates.

281

### 282 *Hybridization and introgression between species*

283 We used the software *HyDe* (Blischak, Chifman, Wolfe, & Kubatko, 2019) to detect  
284 instances of hybridization and introgression between focal taxa. *HyDe* uses phylogenetic  
285 invariants to detect hybridization between two parental lineages into a hybrid lineage, can  
286 differentiate between hybrid speciation and introgression, and can distinguish whether this gene  
287 exchange has occurred in a particular individual versus the population as a whole. We first ran a  
288 modified full *HyDe* analysis. To do so, we tested all possible combinations of parental and  
289 hybrid lineages, but because we are interested in gene flow between, rather than within species,  
290 we removed tests in which both parental lineages were from the same species. We also removed  
291 tests that included the Willamette population of *P. fruticosus*, as preliminary results indicated  
292 that this population produced spurious results, likely because of its small sample size ( $n = 10$ ).  
293 This resulted in 423 total tests for interspecific hybridization. From there, we filtered out tests  
294 which did not produce statistically significant results at  $\alpha = 0.05$  after a Bonferroni correction.  
295 To assess the degree to which populations vs. individuals are introgressed, we subsequently  
296 implemented individual and bootstrap *HyDe* analyses on the parent-hybrid triplets that produced  
297 significant results from the modified full analysis.

298

299 **Results:**

300 *Data generation*

301 For the combined data set, our filtering process resulted in 1,739 total retained loci, with  
302 an average of 1,502 loci per sample ( $\pm 166$ ), and 5,061 total parsimony-informative sites.

303 Average heterozygosity was estimated to be  $0.0105 \pm 0.0077$ , and our data matrix had 13.73%  
304 missing SNPs. Results for both inter- and intra-specific data sets are summarized in Table 1.

305

306 *Identification of populations*

307 For *P. fruticosus*, *P. davidsonii*, and *P. newberryi*, we used  $K = 2$  for downstream  
308 analyses, and for *P. rupicola* and *P. cardwellii*, we used  $K = 3$  (Figure 2). Explanations of our  
309 decisions for each species can be found accompanying Supplemental Figure 1.  $K$  values for *P.*  
310 *fruticosus* correspond loosely to one cluster representing the northern extent of the species' range  
311 in the Cascades and into Ochoco National Forest, and the other cluster representing the southern  
312 extent of the species' range in the Cascades. For *P. rupicola*, a north-south gradient is evident.  
313 The first of the three identified cluster for this species corresponds to the southern-most extent of  
314 the species' range in the Klamath Mountains. The second cluster corresponds to the  
315 southernmost extent of the Cascades, Mt. Shasta, the Klamath Mountains in southeastern  
316 Oregon, and near Crater Lake. The third cluster corresponds to the northern-most extent of the  
317 species' range in the north Cascades, and extends south to Sisters Mountains in Oregon. There is  
318 a clear grade between the northern and southern clusters that begins near Crater Lake and ends  
319 near the Columbia River. There is also an outlier introgressed location north of the Columbia  
320 River, which appears to be admixed between all three clusters. For *P. davidsonii*, one cluster is  
321 found almost exclusively north of the Columbia River, and the other cluster is exclusively south

322 of the Columbia River, with admixture in two locations near Crater Lake and near Mt. Jefferson.  
323 For *P. cardwellii*, one cluster corresponds to the southern-most extent of the species' range, in  
324 the Klamath Mountains. A second cluster corresponds to the coast range north of the Klamath  
325 Mountains, and into the Cascades near Mt. St. Helens and just south of the Columbia River. The  
326 third cluster corresponds to the eastern portion of this species' range, beginning near Mt. Hood  
327 and moving southwards along the Cascades crest.

328

### 329 *Species distribution models*

330 Average ROC scores across replicates and modelling strategies were generally high.  
331 General results for each species are reported in Table 2, and average variable importance across  
332 replicates for each model and variable are reported in Supplemental Table 2. SDMs for the  
333 present day identified suitable habitat that extends beyond the known natural range of three  
334 species (*P. rupicola*, *P. fruticosus*, and *P. newberryi*) (Figure 3). In addition, for all species,  
335 suitable habitat shifted north during the mid-Holocene warm period (Figure 3). Conversely, there  
336 was a distinct southward shift in suitable habitat for three species (*P. cardwellii*, *P. newberryi*, *P.*  
337 *rupicola*) during the LGM, and there was noticeably more suitable habitat for all species but one  
338 (*P. cardwellii*) during this time (Figure 3).

339

### 340 *Models of demographic history*

341 We found support for post-LGM divergence models for three out of five species (Figure  
342 4; Table 3). We also found support for a pre-LGM divergence model for one species (*P.*  
343 *rupicola*), and were unable to reach any definitive conclusion for another (*P. fruticosus*). For the  
344 three species supported by post-LGM models (*P. cardwellii*, *P. newberryi*, *P. davidsonii*),

345 average error rates were low, at a rate near or below 0.05 (Table 3). However, for the two  
346 remaining model sets, average error rates were moderate-to-high, at 0.192 (*P. rupicola*) and  
347 0.202 (*P. fruticosus*). Average posterior probabilities tended to be the highest for species with  
348 low error rates, and *vice versa*. For the two species with three-lineage models, (*P. cardwellii* and  
349 *P. rupicola*), lineages in the Klamath Mountains were more differentiated than the other two  
350 identified intraspecific lineages.

351 *Penstemon rupicola* is the only species that strongly supported a pre-LGM divergence  
352 model. In all replicates, the best model for this species was one of pre-LGM divergence, had the  
353 northern and southern lineages as sister, and included gene flow between the Klamath lineage  
354 and one of the other lineages (Figure 4). However, there was some uncertainty in model selection  
355 for this species. Posterior probabilities for the best model were low (Table 3), and average error  
356 rates for the best model were higher than any other model (Supplemental Table 3). The  
357 confusion matrix indicates that models identical in all aspects but their gene flow parameters  
358 (*e.g.*, models 4, 5, and 6) were the most difficult to differentiate (Supplemental Table 3). Only  
359 one other model (model 1) received votes; however, this model is one of post-LGM divergence,  
360 and does not include gene flow, although it has the same topology as models 4-6. We interpret  
361 these results as strong support for the relationships between *P. rupicola* lineages, and a  
362 reasonable degree of support for the oldest divergence times between populations preceding the  
363 LGM.

364 A post-LGM divergence model was supported for three species: *P. cardwellii*, *P.*  
365 *newberryi*, and *P. davidsonii*. For *P. cardwellii*, the best model was one of post-LGM  
366 divergence, with the eastern and western populations sister to one another (Figure 4). No pre-  
367 LGM divergence model received more than 5% of the votes (Supplemental Table 4). For *P.*



368 *newberryi*, all replicates strongly supported the post-LGM divergence model (Figure 4; Table 3).  
369 The only other model that received votes for *P. newberryi* was the pre-LGM divergence that  
370 included gene flow (Supplemental Table 5). The same is true for *P. davidsonii*; all replicate runs  
371 for *P. davidsonii* strongly supported the post-LGM divergence model, and the vast majority of  
372 votes given to alternative models were given to the pre-LGM divergence model with secondary  
373 contact (Supplemental Table 6).

374 Demographic model tests for *P. fruticosus* were inconclusive, as error rates were high,  
375 and posterior probabilities were low (Table 3). Each of the three models received the most votes  
376 in at least one replicate (Supplemental Table 7). We therefore cannot determine the best  
377 demographic scenario for *P. fruticosus*.

378

#### 379 *Relationships between lineages*

380 The lineage tree inferred with *SVDQuartets* presents an overall strongly supported  
381 topology (Figure 5). Immediately apparent is the strong geographic pattern present, especially  
382 with respect to the Klamath Mountains, as all of the Klamath lineages from separate species form  
383 a single clade with strong support (100% bootstrap). Second, *P. cardwellii*, *P. fruticosus*, and *P.*  
384 *newberryi*, as currently circumscribed, are polyphyletic. Of the three identified genetic lineages  
385 of *P. cardwellii*, none are sister to one another. *Penstemon newberryi* var. *berryi* is sister to the  
386 Klamath lineage of *P. rupicola*, although this pair is then sister to *P. newberryi* var. *newberryi*.  
387 The northern lineage of *P. fruticosus* is sister to *P. davidsonii* with high bootstrap support  
388 (100%), which the southern lineage falls within the clade containing the other four species, and  
389 is sister to the eastern lineage of *P. cardwellii*.

390

391 *Hybridization and introgression between species*

392 Our tests of hybridization and introgression revealed substantial evidence for  
393 hybridization between species. Of the 423 total tests considered, 45 of these (10.6%) were  
394 statistically significant (Supplemental Table 8). Of these significant results, 39 of them (86.7%)  
395 included at least one lineage from the Klamath Mountains, either as a parent or a hybrid lineage.  
396 Since only 273 of the initial 423 tests (64.5%) matched this criterion, lineages from the Klamath  
397 Mountains are overrepresented as probable players in hybridization in *Dasanthera*. This  
398 overrepresentation of lineages from the Klamath Mountains is visualized in a heat map in  
399 Supplemental Figure 2. Here, the Klamath lineages are clearly involved in more putative  
400 hybridization events than any other lineages, both between themselves and between non-Klamath  
401 lineages. Further inspection of putative hybridization events involving no Klamath lineages  
402 identified (1) the ‘southern’ *P. davidsonii* lineage and (2) the ‘southern’ *P. rupicola* lineage as  
403 potential hybrid lineages.

404 There are four putative parental sources responsible for the formation of the southern *P.*  
405 *davidsonii* lineage: the northern *P. davidsonii* lineage, the eastern *P. cardwellii* lineage, the  
406 southern *P. rupicola* lineage, and the northern *P. fruticosus* lineage. The distribution of  $\gamma$  across  
407 bootstrap replicates for each putative hybridization event can be found in Supplemental Figure  
408 3a. Our results indicate that the putative hybridization events forming the southern *P. davidsonii*  
409 lineage likely represent instances of introgression, rather than hybrid speciation, since average  $\gamma$   
410 values are not close to 0.5. Further, since we do not see a pattern of jumping between  $\gamma$  values  
411 with no estimates between, these results likely indicate uniform admixture (Blischak *et al.*,  
412 2018).

413 Like the southern *P. davidsonii* lineage, our analyses with *HyDe* identified four parental  
414 sources putatively responsible for the formation of the southern *P. rupicola* lineage. All  
415 combinations include the northern *P. rupicola* lineage and either the eastern or northern *P.*  
416 *cardwellii* lineages, or the southern *P. davidsonii* lineage. The distribution of  $\gamma$  across bootstrap  
417 replicates (Supplemental Figure 3b) suggests that, again, similar to the southern *P. davidsonii*  
418 lineage, these hybridization events likely represent introgression rather than hybrid speciation,  
419 and admixture is likely uniform.

420 Generally, our results for non-Klamath lineages suggest introgression, rather than hybrid  
421 speciation, as the mechanism by which *Dasanthera* species exchange genes. The reasons for this  
422 are potentially twofold: (1) we intentionally did not include obvious hybrids, focusing our efforts  
423 on the demographic history of species and understanding hybridization in a phylogenetic context,  
424 and (2) our sampling is broad, rather than at the population scale, meaning we are considering  
425 lineages at a phylogenetic scale rather than at a population-genetic scale.

426

## 427 **Discussion:**

428 We examined population structure, inferred relationships between species, modeled  
429 demographic histories, and reconstructed species distribution models for five PNW-distributed  
430 species in *Penstemon* subgenus *Dasanthera*. Our analyses suggest that Quaternary glacial cycles  
431 played a key role in shaping species' distributions through time, which in turn affected patterns  
432 of intraspecific genetic diversity. We uncovered a prevalent north-to-south axis of genetic  
433 differentiation that is consistent with patterns observed in other taxa from the region (*e.g.*, Soltis  
434 *et al.*, 1997). In addition, we find evidence that the bulk of intraspecific genetic variation in these  
435 species is likely not due to vicariance prior to the LGM (Figure 4). To the contrary, our SDMs

436 suggest that most species' ranges expanded and experienced greater connectivity during the  
437 LGM than after glacial retreat (Figure 3). Of particular phylogeographic importance for these  
438 species are the Klamath Mountains, as they host a large portion of genetic diversity (Figure 2),  
439 and appear to be a hotspot for gene exchange both within and between species (Supplemental  
440 Figure 2). In turn, the large degree of hybridization in the Klamath Mountains blurs species  
441 limits and makes inferring relationships between species in this region challenging (Figure 5).

442

#### 443 *The near-absence of glacial refugia*

444 We posit that for *P. newberryi*, *P. fruticosus*, and *P. davidsonii*, large amounts of suitable  
445 habitat during the LGM resulted in greater population connectivity, facilitating both intra- and  
446 inter-specific gene flow. Subsequent range reductions during the mid-Holocene then caused  
447 population fragmentation, resulting in species' distributions that are similar to the present day. In  
448 turn, this geographic isolation may have led to population-genetic substructure, which was then  
449 identified with our *STRUCTURE* analyses. *Penstemon cardwellii* is the most mesic-tolerant  
450 *Dasanthera* member, is found in both the Oregon Coast Range as well as the inland Cascades,  
451 and was the only species in this study with less suitable habitat during the LGM. Consequently,  
452 coastal *P. cardwellii* populations may have exhibited a response to glaciation (Figure 3) similar  
453 to other coastal species associated with PNW mesic flora (e.g., Smith *et al.*, 2018). Coupled with  
454 the distinct reduction in suitable habitat for *P. cardwellii* is a southern range shift along the  
455 Pacific coast. There is little suitable habitat north of the Klamath Mountains for this species,  
456 implicating this region as a potential LGM refugium. *Penstemon rupicola*, like most of the other  
457 species, likely shifted its range south during the LGM (Figure 3). However, this species is the  
458 only one that supported a model of pre-LGM divergence (Figure 4), suggesting that the *P.*

459 *rupicola* lineage from the Klamath Mountains may have been isolated since the last interglacial  
460 period, or even earlier. An important caveat to consider is that while many of these species  
461 appear to exhibit a signal of recent (post-LGM) divergence, this signal does not preclude - and in  
462 fact likely obscures - more ancient and complex demographic histories. The PNW has  
463 experienced repeated glaciation events throughout the Pleistocene, all of which undoubtedly  
464 altered species' distributions and affected the geographic context in which gene flow occurred  
465 (Hewitt, 2004; Shafer *et al.*, 2010). Given the age of the *Dasanthera* clade, estimated to have  
466 formed during the early Pleistocene roughly 1.9 MYA (Wolfe *et al.*, unpublished data), it is  
467 likely that all of the species examined in this study would have experienced several oscillations  
468 of colder periods during glaciation and warmer periods following glacial retreat. The simple  
469 models of demographic history that we have employed in this study are, by virtue of their design,  
470 unable to capture that complexity.

471         The classic paradigm regarding species' responses to glacial cycles posits that, generally,  
472 temperate species will contract their ranges during peak glacial activity, often congregating in  
473 refugia, and subsequently expand their ranges during interglacial periods (Hewitt, 2000; Hewitt,  
474 2004). However, for four of the five taxa examined here, we observe the inverse pattern; it  
475 appears that most *Dasanthera* species expanded their ranges during the LGM, and subsequently  
476 retracted their ranges in the ensuing interglacial period (Figure 3). While this pattern has been  
477 observed in other species, typically it has been restricted to cold-adapted taxa (Martinet *et al.*,  
478 2018; Stewart *et al.*, 2010) or to Neotropical systems (Leite *et al.*, 2016; Perez, Bonatelli,  
479 Moraes, & Carstens, 2016), although see Gür (2013). Our results suggest that the longstanding  
480 consensus of temperate species' responses to glacial cycles may not be as generally applicable as  
481 previously thought.

482

483 *The 'central' importance of the Klamath Mountains*

484         Our analyses suggest the presence of suitable habitat in the Klamath Mountains during  
485 the LGM for every species included in this study (Figure 3). This, combined with our analyses  
486 implicating this region as a hotspot for interspecific hybridization (Supplemental Figure 2) and  
487 genetic differentiation (Figure 2), highlight the phylogeographic importance of the Klamath  
488 Mountains to *Dasanthera* species. As noted earlier, this region has been identified as an  
489 important geographic feature for many plant and animal taxa (Eckert *et al.*, 2008; Furnier &  
490 Adams, 1986; Goebel *et al.*, 2009; Gugger *et al.*, 2010; Kiefer *et al.*, 2009; Kuchta & Tan, 2005;  
491 Smith & Sawyer, 1988; Soltis *et al.*, 1997; Patterson & Givnish, 2003; Pelletier *et al.*, 2011;  
492 Whittaker, 1961). In particular, the Klamath region is thought to owe much of its diversity to its  
493 topographical complexity and its proximity to several other mountain ranges, including the  
494 Cascades and Sierra Nevada Mountains, and the coastal ranges of Oregon and California. This  
495 allows species from more northern latitudes to access the area when the climate cools, and then  
496 persist at higher elevations when conditions warm again (Smith & Sawyer, 1988; Whittaker,  
497 1961). We hypothesize that the Klamath Mountains have served a similar role for *Dasanthera*  
498 species, and suggest that this region serves as a 'choke-point' for species' movement between the  
499 Cascades and Sierra Nevada Mountains. The following scenario could explain both the  
500 abundance of *Dasanthera* diversity in the Klamath Mountains and the relative lack of diversity in  
501 the Sierra Nevada Mountains. (1) As the climate cools, species distributed at more northerly  
502 latitudes shift their ranges southward. (2) Species' distributions begin to experience more  
503 overlap, and the poor long-distance dispersal ability of *Dasanthera* leads to species' ranges  
504 overlapping in the Klamath Mountains, as it is the only geographically proximate area with

505 suitable habitat. (3) Species begin to exchange genes when in sympatry, forming complex  
506 hybridization networks and blurring species limits in this region. The resulting hybrids that  
507 persist form hybrid swarms (lineage fusion), which, over time, become the predominant forms in  
508 the region. (4) These hybrids become less fit and more susceptible to genetic homogenization  
509 from parental taxa the further from the Klamath Mountains they get, until they grade into *P.*  
510  *davidsonii*/*P. newberryi* in the Sierra Nevada Mountains, or *P. davidsonii*/*P. rupicola* in the  
511 Cascades.

512

513 *Interplay between hybridization and species limits in Penstemon subgenus Dasanthera*

514 Hybridization has undoubtedly made identifying relationships between *Dasanthera*  
515 species challenging. Previous efforts have been conducted to infer relationships between species  
516 using nuclear and chloroplast sequence data, and inter-simple sequence repeat markers (Datwyler  
517 & Wolfe, 2004). The tree produced in Datwyler and Wolfe (2004) suffers from low bootstrap  
518 support along the backbone of the tree, and its topology differs substantially from the tree  
519 presented in this study (Figure 5). This is due, at least in part, to the relative lack of parsimony-  
520 informative sites in the *ITS* and *matK* sequence data, but the prevalence of hybridization across  
521 this subgenus also almost certainly contributed to the uncertainty in species relationships  
522 observed in Datwyler and Wolfe (2004). It is worth noting that Albert Every, using  
523 morphological and chemical features of *Dasanthera* taxa, suggested the same relationships  
524 between species in subgenus *Dasanthera* as identified in this study (Every, 1977). Every (1977)  
525 also noted the abundance of gene flow between species in the Klamath region, and suggested a  
526 complicated network where *P. newberryi* var. *berryi* was freely exchanging genes with *P.*  
527  *rupicola* and *P. cardwellii*, and that genes from *P. cardwellii* were introgressed into *P. rupicola*,

528 which in turn introgressed into *P. davidsonii*. While the exact details of Every's hypotheses were  
529 not explicitly tested here, they do serve as a useful indicator of the complex demographic history  
530 of *Dasanthera* in the Klamath Mountains.

531 Despite our findings, species limits in *Dasanthera* will need revisited, at least in the  
532 context of the clade containing *P. cardwellii* and the lineages from the Klamath Mountains. The  
533 work presented here elucidates some of the relationships among species distributed in the  
534 Cascades and Sierra Nevada Mountains with strong support. However, the prevalence of gene  
535 flow between species may confound these inferences and provide a false signal of confidence.  
536 Because we have shown that the evolutionary history of these species includes introgression  
537 events, species' relationships are likely more accurately portrayed as a network; any evolutionary  
538 history of *Dasanthera* species depicting solely bifurcating lineages is therefore an insufficient  
539 explanation of the relationships between species in this subgenus. As a result, the tree presented  
540 in this work should be interpreted with caution, especially for lineages in the Klamath  
541 Mountains.

542 While we have explored the occurrence and geographic location of hybridization, the  
543 mechanisms underlying why it occurs – or at least, the reason why hybrids appear to persist –  
544 remains unanswered. Conversely, the question remains: what maintains species boundaries  
545 between *Dasanthera* species at all? Cross-fertilization experiments have verified that there are  
546 likely few cytogenetic barriers, if any, that prevent the formation of hybrid taxa (Every, 1977;  
547 Viehmeyer, 1958). Several studies focusing on hybrids between *P. newberryi* and *P. davidsonii*  
548 have supported this finding, and have elaborated on questions regarding hybrid fitness (Clausen  
549 *et al.*, 1940; Kimball, 2008; Kimball, Campbell, & Lessin, 2008; Kimball & Campbell, 2009).  
550 *Penstemon newberryi* and *P. davidsonii* are the only two *Dasanthera* species located in the



551 Sierra Nevada Mountains, and they form extensive hybrid zones where their ranges overlap  
552 (Clausen *et al.*, 1940; Every, 1977). Investigations into the mechanisms controlling hybrid  
553 formation and persistence uncovered that hybrids are likely formed due to a shared pollinator  
554 community (Kimball, 2008), and that intermediate resource use and physiological tolerances  
555 likely allow hybrids to persist in intermediate environments (Kimball & Campbell, 2009). There  
556 also appear to be few cytogenetic barriers to hybrid formation between these species, although  
557 there is an apparent maternal effect to hybrid fitness with respect to elevation (Kimball *et al.*,  
558 2008).

559         Despite this, we have uncovered extensive hybridization between other *Dasanthera*  
560 species in the Klamath Mountains, the genetic signatures of which extend well beyond this  
561 geographic region into source populations of parental species. Furthermore, we identified two  
562 additional lineages (southern *P. davidsonii* and southern *P. rupicola*) not associated with  
563 Klamath Mountain lineages that exhibit evidence of introgression from other taxa (Supplemental  
564 Figure 3). The widespread persistence of this introgression implies that F1 hybrids are able to  
565 backcross into their parental species, making genetic differentiation via reinforcement unlikely.  
566 Therefore, while there is evidence suggesting that reduced hybrid fitness can maintain species  
567 boundaries via reinforcement in *P. davidsonii* x *P. newberryi* hybrid zones, our results indicate  
568 that reinforcement is likely not maintaining species boundaries in most other *Dasanthera* hybrid  
569 zones. In these cases, it seems more probable that species boundaries are formed and maintained  
570 when species' ranges do not overlap, limiting gene flow due to poor dispersal ability.

571

572

573

574 **Acknowledgements:**

575 Funding was provided by the US National Science Foundation grant DEB-1455399. We thank  
576 the University of Washington Herbarium at the Burke Museum and the Oregon State University  
577 Herbarium for providing sample loans. We thank the Unity computing cluster at Ohio State  
578 University for the use of computing nodes for data processing and analysis. We thank Connor  
579 Lang for assistance with collections in the field, Dr. Shannon Datwyler for the donation of  
580 samples, and Dr. Megan Smith for advice on the GBS protocol. We also thank Dr. Megan Smith  
581 and members of the Wolfe lab for comments that improved this manuscript prior to publication.

582

583 **Data Accessibility:** All scripts and parameter files used for data processing and analysis, along  
584 with unprocessed sequence reads and processed inter- and intraspecific reads, are available on  
585 Dryad (<https://doi.org/10.5061/dryad.n5tb2rbtf>).

586

587 **Author Contributions:**

588 B.W.S and A.D.W designed the study and collected samples. B.W.S collected genomic data,  
589 performed analyses and wrote the manuscript. B.W.S and A.D.W edited the manuscript and  
590 approved its final version.

591

592

593

594

595

596

597 **Figures:**

598 *Figure 1.* Demographic models implemented in *delimitR* for two-population (b, f-g) and three-  
599 population (a, c-e) scenarios. Two basic sets of models were tested: post-LGM divergence (a-b)  
600 and pre-LGM divergence (c-g). The two basic model sets differ in divergence time priors and the  
601 addition of secondary contact in pre-LGM divergence models.

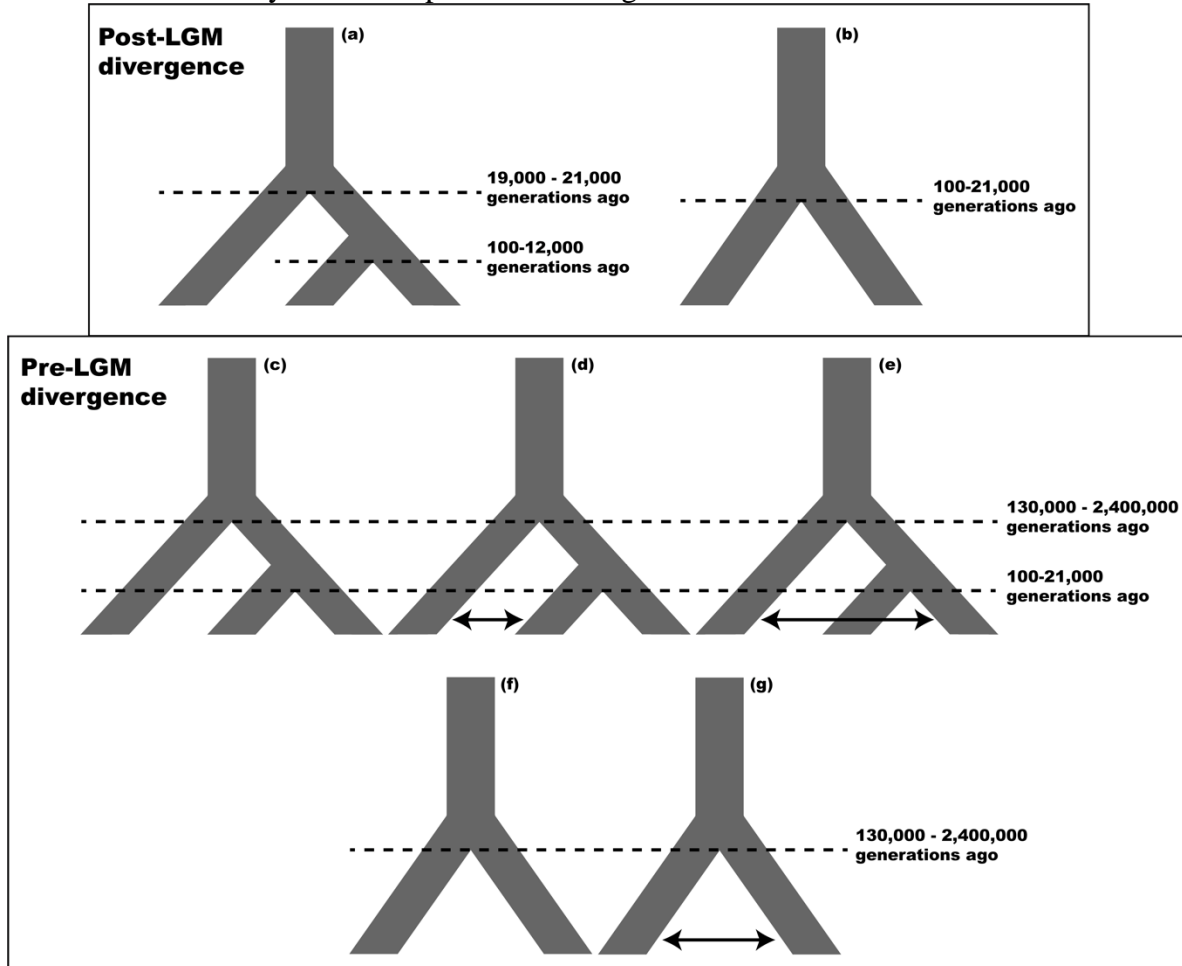

602

603

604

605

606

607

608

609

610 *Figure 2.* (a) Map of the Pacific Northwest. Highlighted areas correspond to the Sierra Nevada  
611 (orange), Cascades and North Cascades (red), and the Klamath Mountains (blue), as defined by  
612 the United States Environmental Protection Agency. (b-f) STRUCTURE results plotted on  
613 collection localities for (b) *P. davidsonii*, (c) *P. newberryi*, (c) *P. fruticosus*, (e) *P. cardwellii*, and  
614 (f) *P. rupicola*. Colors in the pie charts correspond to the probability of membership of an  
615 individual to each of the  $K$  intraspecific populations. Colors for one species do not correspond to  
616 colors in a different species, and darkly shaded areas represent approximate species' ranges.

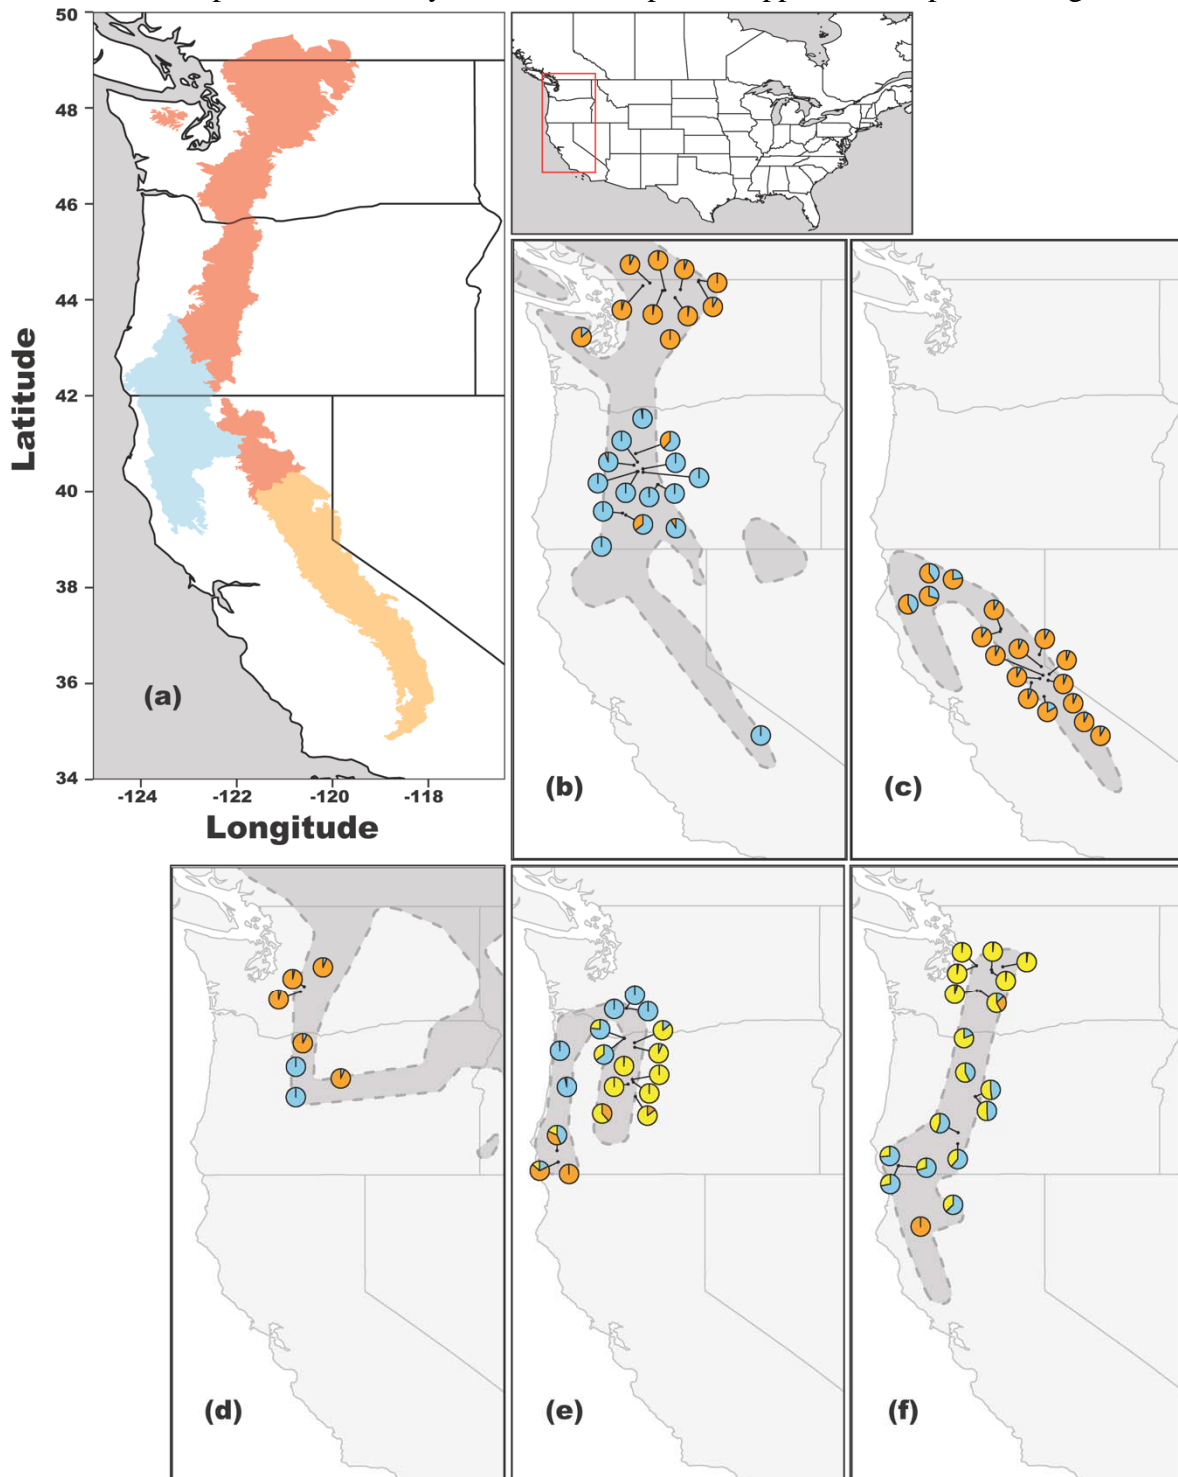

618 *Figure 3.* Species distribution models (SDMs) for five *Penstemon* subgenus *Dasanthera* species.  
619 From left to right, plots indicate projections for the present-day, the mid-Holocene warm period,  
620 and the LGM. Habitat suitability scores are represented by the heat map on the right; warmer  
621 colors indicate higher habitat suitability. The light blue regions in the LGM plots represent areas  
622 with glacial cover.

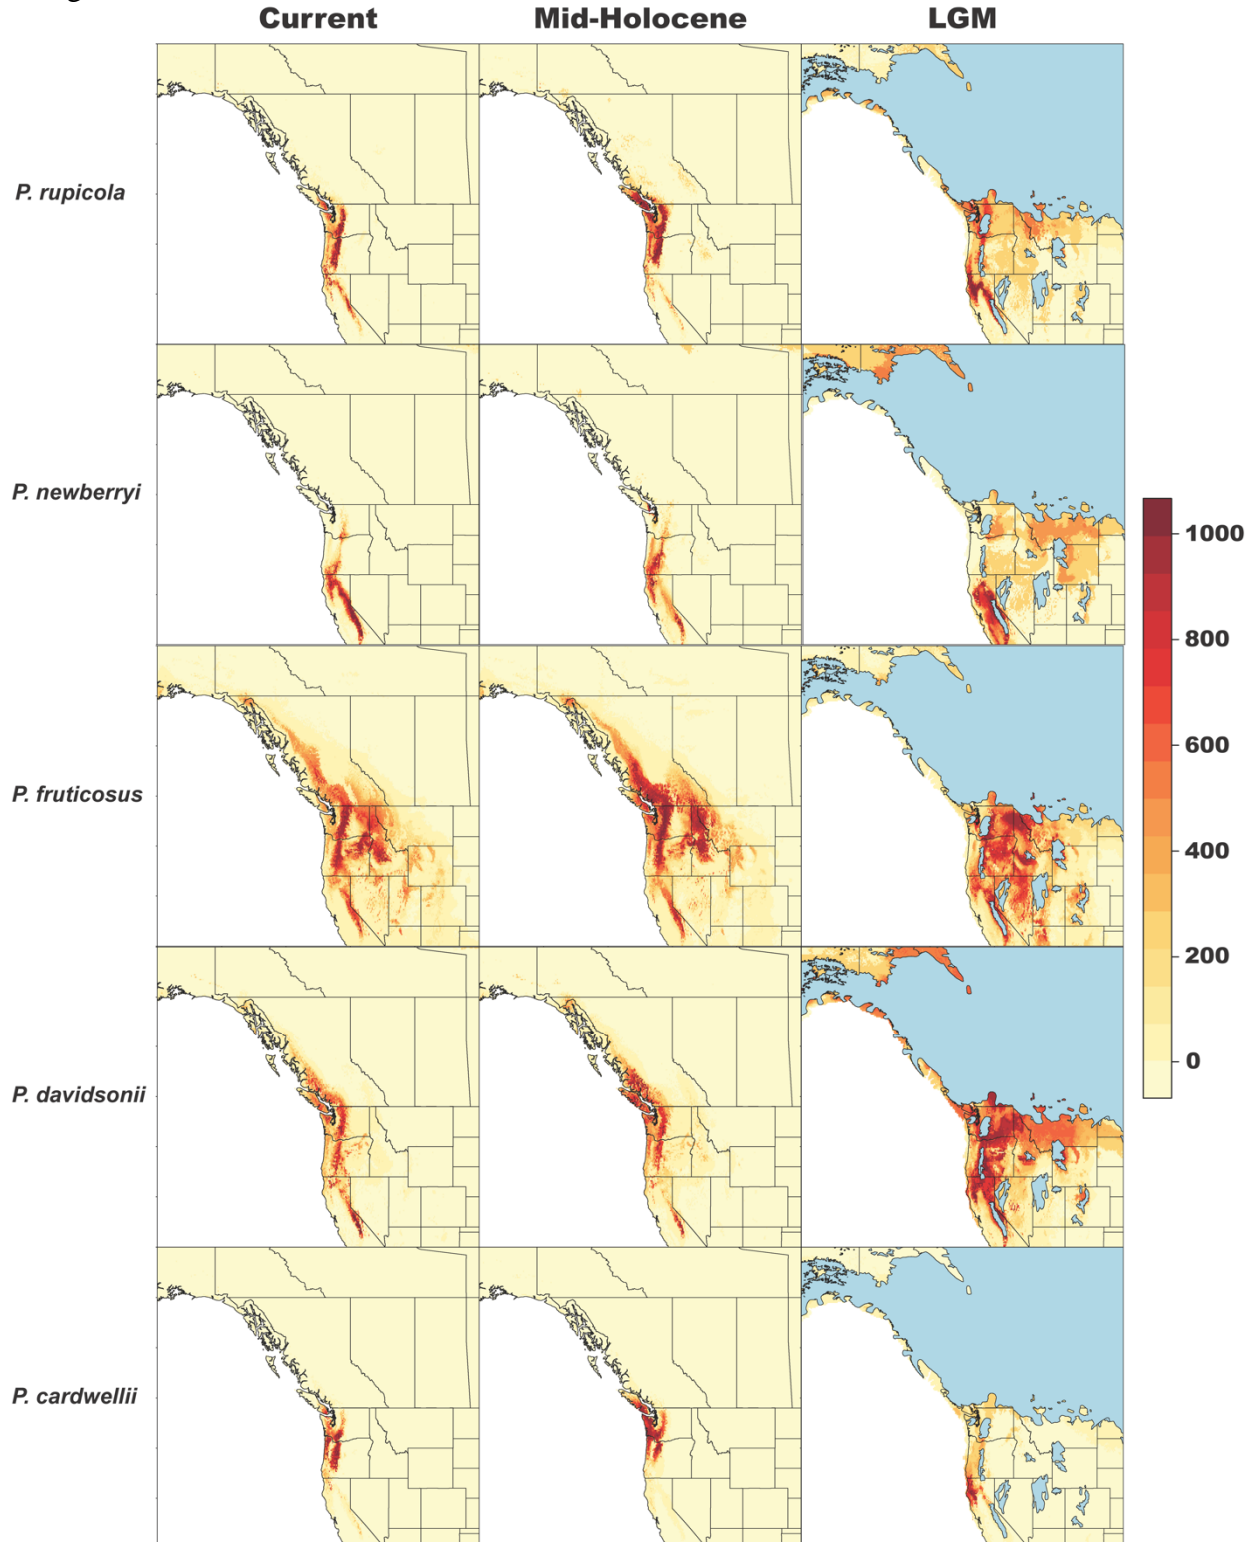

623

624 *Figure 4.* The most strongly supported demographic model for each species. No model for *P.*  
625 *fruticosus* is shown because of the equivocal results for that species. Colors correspond to the  
626 clusters shown in Figure 2. Models are separated on the basis of (a) pre-LGM and (b) post-LGM  
627 divergence.

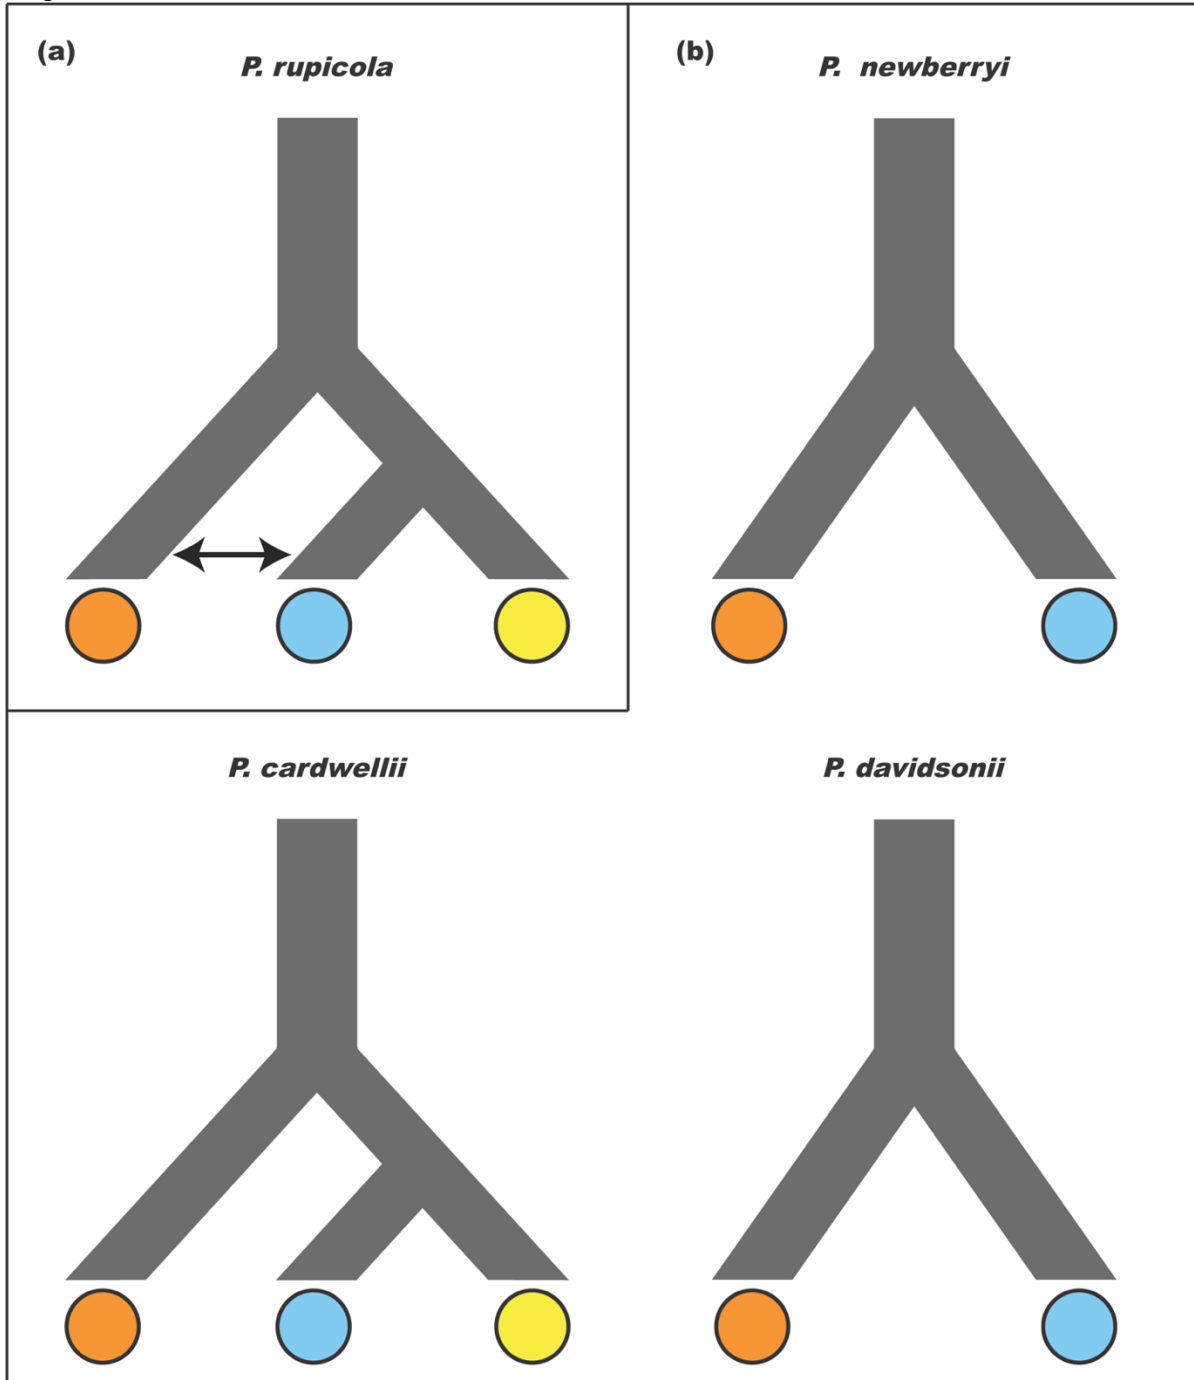

628

629

630

631 *Figure 5.* Lineage tree constructed with *SVDQuartets*. Bootstrap scores are presented at the  
632 nodes. An individual's lineage was determined by the majority genetic cluster for that individual  
633 as inferred by the *STRUCTURE* analyses. Each color corresponds to a nominal species.

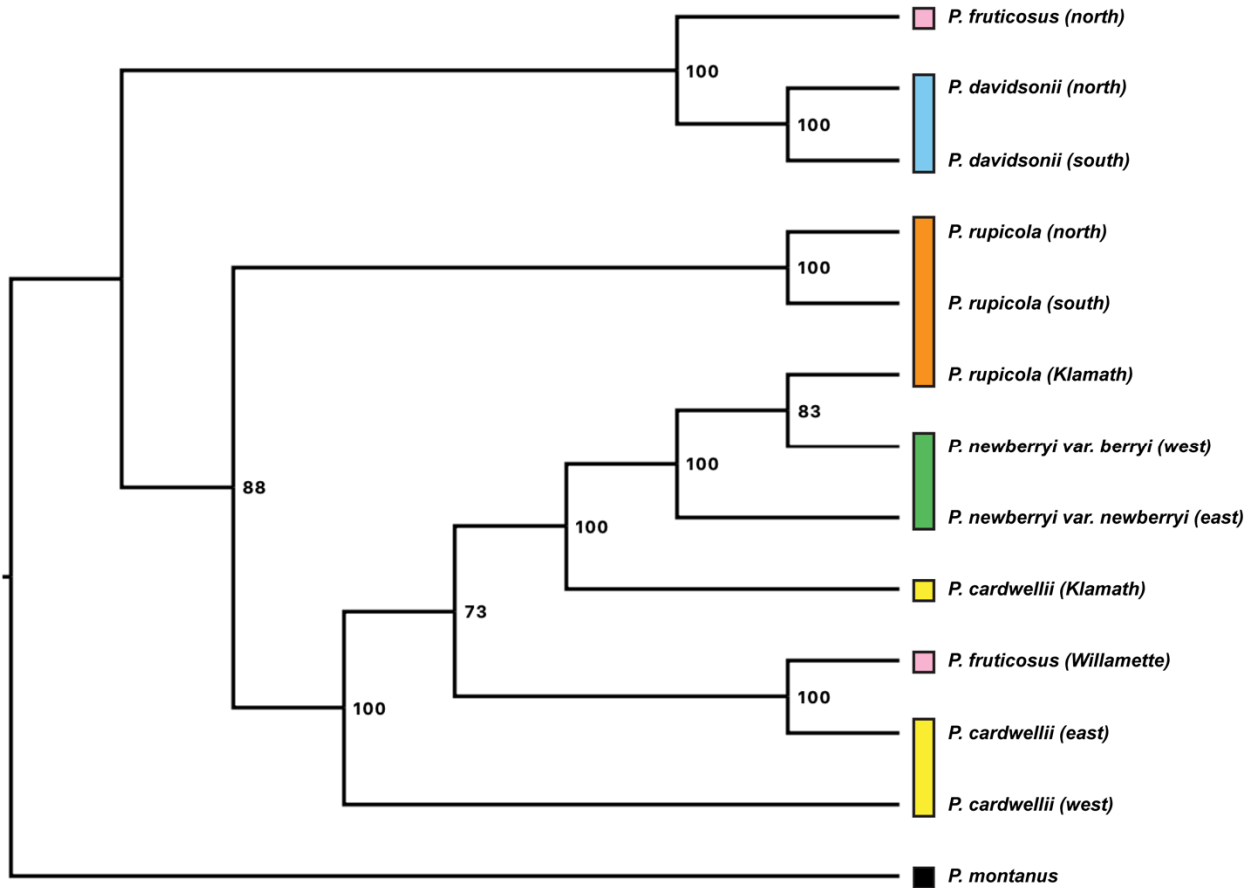

634

635

636

637

638

639

640

641

642

643

644 **Tables:**

645 *Table 1.* Post-processing GBS data generation statistics. All rows refer to intraspecific data sets,  
646 except for the final row, which refers to the interspecific data set. LPS = average loci per sample;  
647 TPI = total parsimony informative sites;  $H_e$  = average heterozygosity estimates.

| Species               | Total loci | LPS             | TPI  | $H_e$           | % missing SNPS |
|-----------------------|------------|-----------------|------|-----------------|----------------|
| <i>P. rupicola</i>    | 2454       | 2148.3 ± 235.01 | 2645 | 0.0106 ± 0.0094 | 13.11%         |
| <i>P. cardwellii</i>  | 2476       | 2192.3 ± 265.2  | 3649 | 0.0075 ± 0.0043 | 12.95%         |
| <i>P. newberryi</i>   | 2382       | 2129.1 ± 206.6  | 2159 | 0.0093 ± 0.0059 | 12.00%         |
| <i>P. davidsonii</i>  | 2494       | 2185.9 ± 243.6  | 3339 | 0.0144 ± 0.0085 | 12.89%         |
| <i>P. fruticosus</i>  | 3333       | 2656.6 ± 388.3  | 2128 | 0.0104 ± 0.0092 | 19.08%         |
| Total (inter-species) | 1739       | 1502.5 ± 165.9  | 5061 | 0.0105 ± 0.0077 | 13.74%         |

648

649

650

651

652

653

654

655

656

657

658

659

660

661

662

663

664



665 *Table 2.* Results of species distribution modeling. Numbers correspond to the average of ROC  
666 values across 5 replicates for each model. Models correspond to the Maximum Entropy model as  
667 implemented in *Maxent* (MAXENT.Phillips), General Linear Models (GLM), Random Forests  
668 (RF), and Generalized Boosting Models (GBM).

| Species              | MAXENT.Phillips | GLM   | RF    | GBM   |
|----------------------|-----------------|-------|-------|-------|
| <i>P. rupicola</i>   | 0.941           | 0.994 | 0.996 | 0.995 |
| <i>P. cardwellii</i> | 0.986           | 0.991 | 0.997 | 0.983 |
| <i>P. newberryi</i>  | 0.965           | 0.997 | 0.997 | 0.997 |
| <i>P. davidsonii</i> | 0.874           | 0.992 | 0.994 | 0.994 |
| <i>P. fruticosus</i> | 0.957           | 0.955 | 0.968 | 0.960 |

669

670

671

672

673

674

675

676

677

678

679

680

681

682

683

684

685

686

687 *Table 3.* Results of the demographic model tests in *delimitR* for each species. Average error and  
688 average posterior probabilities correspond to the average of the out-of-bag error rates and  
689 posterior probabilities across five replicates.

| Species              | Average Error Rate | Best Model                     | Average Posterior Probability |
|----------------------|--------------------|--------------------------------|-------------------------------|
| <i>P. rupicola</i>   | 0.192              | Pre-LGM divergence + migration | 0.611                         |
| <i>P. cardwellii</i> | 0.043              | Post-LGM divergence            | 0.987                         |
| <i>P. newberryi</i>  | 0.048              | Post-LGM divergence            | 0.939                         |
| <i>P. davidsonii</i> | 0.059              | Post-LGM divergence            | 0.995                         |
| <i>P. fruticosus</i> | 0.202              | Equivocal                      | 0.452                         |

690

691

692

693

694

695

696

697

698

699

700

701

702

703

704

705

706

707

708 **Literature Cited:**

- 709 Anderson, E., & Stebbins, G. L. (1954). Hybridization as an evolutionary stimulus. *Evolution*, **8**,  
710 378-388.
- 711 Avise, J. C. (2000). *Phylogeography: The history and formation of species*. Cambridge, MA:  
712 Harvard University Press.
- 713 Blischak, P. D., Chifman, J., Wolfe, A. D., & Kubatko, L. S. (2018). HyDe: A python package  
714 for genome-scale hybridization detection. *Systematic Biology*, **67**, 821:829. doi:  
715 10.1093/sysbio/syy023
- 716 Brunsfeld, S. J., Sullivan, J., Soltis, D. E., & Soltis, P. S. (2001). Comparative phylogeography  
717 of northwestern North America: a synthesis. *Special Publication-British Ecological*  
718 *Society*, **14**, 319-340.
- 719 Butlin, R. (1987). Speciation by reinforcement. *Trends in Ecology & Evolution*, **2**, 8-13.
- 720 Chifman, J., & Kubatko, L. (2014). Quartet inference from SNP data under the coalescent model.  
721 *Bioinformatics*, **30**, 3317-3324. doi: 10.1093/bioinformatics/btu530
- 722 Clausen, J., Keck, D. D., & Hiesey, H. M. (1940). *Experimental studies on the nature of species.*  
723 *III. Environmental responses of climatic races of Achillea*. Carnegie Institution of  
724 Washington Publication No. 520, Washington, District of Columbia.
- 725 Colella, J. P., Lan, T., Schuster, S. C., Talbot, S. L., Cook, J. A., & Lindqvist, C. (2018). Whole-  
726 genome analysis of *Mustela erminea* finds that pulsed hybridization impacts evolution at  
727 high latitudes. *Nature Communications Biology*, **1**, 1-10. doi: 10.1038/s42003-018-0058-  
728 y
- 729 Currat, M., Ruedi, M., Petit, R. J., & Excoffier, L. (2008). The hidden side of invasions: Massive  
730 introgression by local genes. *Evolution*, **62**, 1908-1920. Doi: 10.1111/j.1558-  
731 5646.2008.00413.x
- 732 Datwyler, S. L., & Wolfe, A. D. (2004). Phylogenetic relationships and morphological evolution  
733 in *Penstemon* subg. *Dasanthera* (Veronicaceae). *Systematic Botany*, **29**, 165-176.
- 734 Dufresnes, C., Nicieza, A. G., Litvinchuk, S. N., Rodrigues, N., Jeffries, D. L., Vences, M., ...  
735 Martínez-Solano, Í. (2020). Are glacial refugia hotspots of speciation and cytonuclear  
736 discordances? Answers from the genomic phylogeography of Spanish common frogs.  
737 *Molecular Ecology*, **29**, 986-1000. doi: 10.1111/mec.15368
- 738 Eaton, D. A. R., & Overcast, I. (2020). Ipyrad: Interactive assembly and analysis of RADseq  
739 datasets. *Bioinformatics*, **36**, 2592-2594. doi: 10.1093/bioinformatics/btz966
- 740 Eckert, A. J., Tarse, B. R., & Hall, B. D. (2008). A phylogeographical analysis of the range  
741 disjunction for foxtail pine (*Pinus balfouriana*, Pinaceae): The role of Pleistocene  
742 glaciation. *Molecular Ecology*, **17**, 1983-1997. doi: 10.1111/j.1365-294X.2008.03722.x
- 743 Elshire, R. J., Glaubitz, J. C., Sun, Q., Poland, J. A., Kawamoto, K., Buckler, E. D., & Mitchell,  
744 S. E. (2011). A robust, simple, genotyping-by-sequencing (GBS) approach for high  
745 diversity species. *PLoS ONE*, **6**, e19379. doi: 10.1371/journal.pone.0019379
- 746 Evanno, G., Regnaue, S., & Goudet, J. (2005). Detecting the number of clusters of individuals  
747 using the software STRUCTURE: A simulation study. *Molecular Ecology*, **14**, 2611-  
748 2620. doi: 10.1111/j.1365-294X.2005.02553.x
- 749 Every, A. D. (1977). *Biosystematics of Penstemon subg. Dasanthera: A naturally hybridizing*  
750 *species complex* (Doctoral dissertation). University of Washington, Seattle, WA.
- 751 Excoffier, L., Dupanloup, I., Huerta-Sánchez, E., Sousa, V. C., & Foll, M. (2013). Robust  
752 demographic inference from genomic and SNP data. *PLoS Genetics*, **9**, e1003905. doi:  
753 10.1371/journal.pgen.1003905

- 754 Freeman, C. C. (2019). *Penstemon*. In Flora of North America Editorial Committee (eds.), *Flora*  
755 *of North America North of Mexico, Volume 17: Magnoliophyta: Tetrachondraceae to*  
756 *Orobanchaceae*. (pp. 82-225). New York, NY: Oxford University Press.
- 757 Furnier, G. R., & Adams, W. T. (1986). Geographic patterns of allozyme variation in Jeffrey  
758 Pine. *American Journal of Botany*, **73**, 1009-1015.
- 759 Garrick, R. C., Bonatelli, I. A. S., Hyseni, C., Morales, A., Pelletier, T. A., Perez, M. F., ...  
760 Carstens, B. C. (2015). The evolution of phylogeographic data sets. *Molecular Ecology*,  
761 **24**, 1164-1171. doi: 10.1111/mec.13108
- 762 Goebel, A. M., Ranker, R. A., Corn, P. S., & Olmstead, R. G. (2009). Mitochondrial DNA  
763 evolution in the *Anaxyrus boreas* species group. *Molecular Phylogenetics and Evolution*,  
764 **50**, 209-225. doi: 10.1016/j.ympev.2008.06.019
- 765 Gugger, P. F., Sugita, S., & Cavender-Bares, J. (2010). Phylogeography of Douglas-fir based on  
766 mitochondrial and chloroplast DNA sequences: testing hypotheses from the fossil record.  
767 *Molecular Ecology*, **19**, 1877-1897. doi: 10.1111/j.1365-294X.2010.04622.x
- 768 Gür, H. (2013). The effects of the Late Quaternary glacial-interglacial cycles on Anatolian  
769 ground squirrels: Range expansion during the glacial periods? *Biological Journal of the*  
770 *Linnean Society*, **109**, 19-32. doi: 10.1111/bij.12026
- 771 Hewitt, G. (2000). The genetic legacy of the Quaternary ice ages. *Nature*, **405**, 907-913. doi:  
772 10.1038/35016000
- 773 Hewitt, G. M. (2004). Genetic consequences of climatic oscillations in the Quaternary.  
774 *Philosophical Transactions of the Royal Society of London B*, **359**, 183-195. doi:  
775 10.1098/rstb.2003.1388
- 776 Hewitt, G. M. (2011). Quaternary phylogeography: The roots of hybrid zones. *Genetica*, **139**,  
777 617-638. doi: 10.1007/s10709-011-9547-3
- 778 Hijmans, R. J., Cameron, S. E., Parra, J. L., Jones, P. G., & Jarvis, A. (2005). Very high  
779 resolution interpolated climate surfaces for global land areas. *International Journal of*  
780 *Climatology*, **25**, 1965-1978. doi: 10.1002/joc.1276
- 781 Kiefer, C., Dobeš, C., Sharbel, T. F., & Koch, M. A. (2009). Phylogeographic structure of the  
782 chloroplast DNA gene pool in North American *Boechera* – A genus and continental-wide  
783 perspective. *Molecular Phylogenetics and Evolution*, **52**, 303-311. doi:  
784 10.1016/j.ympev.2009.03.016
- 785 Kimball, S. (2008). Links between floral morphology and floral visitors along an elevational  
786 gradient in a *Penstemon* hybrid zone. *Oikos*, **117**, 1064-1074. doi: 10.1111/j.2008.0030-  
787 1299.16573.x
- 788 Kimball, S., Campbell, D. R., & Lessin, C. (2008). Differential performance of reciprocal  
789 hybrids in multiple environments. *Journal of Ecology*, **96**, 1306-1318. doi:  
790 10.1111/j.1365-2745.2008.01432.x
- 791 Kimball, S., & Campbell, D. (2009). Physiological differences among two *Penstemon* species  
792 and their hybrids in field and common garden environments. *New Phytologist*, **181**, 478-  
793 488. doi: 10.1111/j.1469-8137.2008.02654.x
- 794 Kuchta, S. R., & Tan, A. (2005). Isolation by distance and post-glacial range expansion in the  
795 rough-skinned newt, *Taricha granulosa*. *Molecular Ecology*, **14**, 225-244. doi:  
796 10.1111/j.1365-294X.2004.02388.x
- 797 Leite, Y. L. R., Costa, L. P., Loss, A. C., Rocha, R. G., Batalha-Filho, H., Bastos, A. C., ...  
798 Pardini, R. (2016). Neotropical forest expansion during the last glacial period challenges

- 799 refuge hypothesis. *Proceedings of the National Academy of Sciences of the United States*  
800 *of America*, **113**, 1008-1013. doi: 10.1073/pnas.1513062113
- 801 Maier, P. A., Vandergast, A. G., Ostoja, S. M., Aguilar, A., & Bohonak, A. J. (2019). Pleistocene  
802 glacial cycles drove lineage diversification and fusion in the Yosemite toad (*Anaxyrus*  
803 *canorus*). *Evolution*, **73**, 2476-2496. doi: 10.1111/evo.13868
- 804 Martinet, B., Lecocq, T., Brasero, N., Biella, P., Urbanová, K., Valterová, I., ... Rasmont, P.  
805 (2018). Following the cold: Geographical differentiation between interglacial refugia and  
806 speciation in the arcto-alpine species complex *Bombus monticola* (Hymenoptera:  
807 Apidae). *Systematic Entomology*, **43**, 200-217. doi: 10.1111/syen.12268
- 808 Otto-Bliesner, B. L., & Brady, E. C. (2006). Last glacial maximum and Holocene climate in  
809 CCSM3. *Journal of Climate*, **19**, 2526-2544.
- 810 Patterson, T. B., & Givnish, T. J. (2003). Geographic cohesion, chromosomal evolution, parallel  
811 adaptive radiations, and consequent floral adaptations in *Calochortus* (Calochortaceae):  
812 Evidence from a cpDNA phylogeny. *New Phytologist*, **161**, 253-264.
- 813 Pelletier, T. A., Duffield, D. A., & DeGrauw, E. A. (2011). Rangewide phylogeography of the  
814 western red-backed salamander (*Plethodon vehiculum*). *Northwestern Naturalist*, **92**,  
815 200-210.
- 816 Perez, M. F., Bonatelli, I. A. S., Moraes, E. M., & Carstens, B. C. (2016). Model-based analysis  
817 supports interglacial refugia over long-dispersal events in the diversification of two South  
818 American cactus species. *Heredity*, **116**, 550-557. doi: 10.1038/hdy.2016.17
- 819 Petit, R. J., Aguinagalde, I., de Beaulieu, J. L., Bittkau, C., Brewer, S., Cheddadi, R., ...  
820 Vendramin, G. G. (2003). Glacial refugia: Hotspots but not melting pots of genetic  
821 diversity. *Science*, **300**, 1563-1565.
- 822 Phillips, S. J., Anderson, R. P., & Schapire, R. E. (2006). Maximum entropy modeling of species  
823 geographic distributions. *Ecological Modelling*, **190**, 231-259. doi:  
824 10.1016/j.ecolmodel.2005.03.026
- 825 Pielou, E. C. (2008). *After the ice age: The return of life to glaciated North America*. Chicago,  
826 IL: University of Chicago Press.
- 827 Pritchard, J. K., Stephens, M., & Donnelly, P. (2000). Inference of population structure using  
828 multilocus genotype data. *Genetics*, **155**, 945-959.
- 829 Renssen, H., Seppä, H., Heiri, O., Roche, D. M., Goosse, H., & Fichet, T. (2009). The spatial  
830 and temporal complexity of the Holocene thermal maximum. *Nature Geoscience*, **2**, 411-  
831 414. doi: 10.1038/NGEO513
- 832 Ruffley, M., Smith, M. L., Espíndola, A., Carstens, B. C., Sullivan, J., & Tank, D. C. (2018).  
833 Combining allele frequency and tree-based approaches improves phylogeographic  
834 inference from natural history collections. *Molecular Ecology*, **27**, 1012-1024. doi:  
835 10.1111/mec.14491
- 836 Shafer, A. B. A., Cullingham, C. I., Côté, S. D., & Coltman, D. W. (2010). Of glaciers and  
837 refugia: A decade of study sheds new light on the phylogeography of northwestern North  
838 America. *Molecular Ecology*, **19**, 4589-4621. doi: 10.1111/j.1365-294X.2010.04828.x
- 839 Smith, J. P., & Sawyer, J. O. (1988). Endemic vascular plants of northwestern California and  
840 southwestern Oregon. *Madroño*, **35**, 54-69.
- 841 Smith, M. L., Ruffley, M., Espíndola, A., Tank, D. C., Sullivan, J., & Carstens, B. C. (2017).  
842 Demographic model selection using random forests and the site frequency spectrum.  
843 *Molecular Ecology*, **26**, 4562-4573. doi: 10.1111/mec.14223

- 844 Smith, M. L., Ruffley, M., Rankin, A. M., Espíndola, A., Tank, D. C., Sullivan, J., & Carstens,  
845 B. C. (2018). Testing for the presence of cryptic diversity in tail-dropper slugs  
846 (*Prophysaon*) using molecular data. *Biological Journal of the Linnean Society*, **124**, 518-  
847 532. doi: 10.1093/biolinnean/bly067
- 848 Smith, M. L., & Carstens, B. C. (2020). Process-based species delimitation leads to identification  
849 of more biologically relevant species. *Evolution*, **74**, 216-229. doi: 10.1111/evo.13878
- 850 Soltis, D. E., Gitzendanner, M. A., Strenge, D. D., & Soltis, P. S. (1997). Chloroplast DNA  
851 intraspecific phylogeography of plants from the Pacific Northwest of North America.  
852 *Plant Systematics and Evolution*, **206**, 353-373.
- 853 Stebbins, G. L. (1985). Polyploidy, hybridization, and the invasion of new habitats. *Annals of the*  
854 *Missouri Botanical Garden*, **72**, 824-832.
- 855 Stewart, J. R., Lister, A. M., Barnes, A., & Dalén, L. (2010). Refugia revisited: Individualistic  
856 responses of species in space and time. *Proceedings of the Royal Society B*, **277**, 661-671.  
857 doi: 10.1098/rspb.2009.1272
- 858 Stone, B. W., & Wolfe, A. D. (2020). Phylogeographic analysis of shrubby beardtongues reveals  
859 range expansions during the Last Glacial Maximum and implicates the Klamath  
860 Mountains as a hotspot for hybridization. *Ohio State University, Dataset*.  
861 <https://doi.org/10.5061/dryad.n5tb2rbtf>
- 862 Thuiller, W., Georges, D., Engler, R., & Breiner, F. (2016). *biomod2: Ensemble platform for*  
863 *species distribution modeling*. R package version 3.3-7. Retrieved from: ([https://cran.r-](https://cran.r-project.org/web/packages/biomod2/index.html)  
864 [project.org/web/packages/biomod2/index.html](https://cran.r-project.org/web/packages/biomod2/index.html))
- 865 Viehmeyer, G. (1958). Reversal of evolution in the genus *Penstemon*. *The American Naturalist*,  
866 **92**, 129-137.
- 867 Wanner, H., Beer, J., Bütikofer, J., Crowley, T. J., Cubasch, U., Flückiger, J., ... Widmann, M.  
868 (2008). Mid- to late Holocene climate change: an overview. *Quaternary Science Reviews*,  
869 **27**, 1791-1828. doi: 10.1016/j.quascirev.2008.06.013
- 870 Wessinger, C. A., Freeman, C. C., Mort, M. E., Rausher, M. D., & Hileman, L. C. (2016).  
871 Multiplexed shotgun genotyping resolves species relationships within the North  
872 American genus *Penstemon*. *American Journal of Botany*, **103**, 912-922. doi:  
873 10.3732/ajb.1500519
- 874 Wessinger, C. A., Rausher, M. D., & Hileman, L. C. (2019). Adaptation to hummingbird  
875 pollination is associated with reduced diversification in *Penstemon*. *Evolution Letters*, **3**,  
876 521-533. doi: 10.1002/evl3.130
- 877 Whittaker, R. H. (1961). Vegetation history of the Pacific coast states and the “central”  
878 significance of the Klamath Region. *Madroño*, **16**, 5-23.
- 879 Wolfe, A. D. (2005). ISSR techniques for evolutionary biology. *Methods in Enzymology*, **395**,  
880 134-144. doi: 10.1016/S0076-6879(05)95009-X
- 881 Wolfe, A. D., Randle, C. P., Datwyler, S. L., Morawetz, J. J., Arguedas, N., & Diaz, J. (2006).  
882 Phylogeny, taxonomic affinities, and biogeography of *Penstemon* (Plantaginaceae) based  
883 on ITS and cpDNA sequence data. *American Journal of Botany*, **93**, 1699-1713.
